# Supplementary material for: An engineered platform to study the influence of extracellular matrix nanotopography on cell ultrastructure
Source: Royal Society of Chemistry journal article supplement (doi:10.1039/d4nr05508j), 2025-01-01
Supplement: d4nr05508j1.xlsx [file d4nr05508j1.xlsx]

## Sheet: Sheet1
SI- directionality histograms
Exp1- aligned
Aligned 02			Aligned 03			Aligned 12			Aligned 22
Direction (∞)	Exp1_aligned02	Exp1_aligned02-fit	Direction (°)	Exp1_aligned03	Exp1_aligned03-fit	Direction (°)	Exp1_aligned12	Exp1_aligned12-fit	Direction (°)	Exp1_aligned22	Exp1_aligned22-fit
-90	0.0127296	0.0114448	-90	0.0153333	0.0138704	-90	0.0175634	0.0152795	-90	0.015965	0.0148065
-87.9775	0.00926173	0.0120967	-87.9775	0.0126277	0.0145006	-87.9775	0.0109973	0.0156069	-87.9775	0.00874784	0.0151203
-85.9551	0.0113334	0.0127949	-85.9551	0.0138557	0.0151387	-85.9551	0.0137676	0.0159158	-85.9551	0.011376	0.0154212
-83.9326	0.0123467	0.0135333	-83.9326	0.0150791	0.0157733	-83.9326	0.0145114	0.0162031	-83.9326	0.0125457	0.0157069
-81.9101	0.0121507	0.0143036	-81.9101	0.0150775	0.0163923	-81.9101	0.0165609	0.0164655	-81.9101	0.016275	0.0159752
-79.8876	0.0125305	0.0150959	-79.8876	0.0173429	0.016983	-79.8876	0.0175264	0.0167	-79.8876	0.0157931	0.0162237
-77.8652	0.0141744	0.0158985	-77.8652	0.0184755	0.0175324	-77.8652	0.0182423	0.0169038	-77.8652	0.017158	0.0164503
-75.8427	0.0154193	0.0166983	-75.8427	0.0196381	0.0180278	-75.8427	0.0177528	0.0170746	-75.8427	0.016121	0.0166531
-73.8202	0.0189641	0.0174808	-73.8202	0.0184548	0.0184572	-73.8202	0.0189513	0.0172104	-73.8202	0.0179009	0.0168303
-71.7978	0.022132	0.0182309	-71.7978	0.018515	0.0188099	-71.7978	0.0194322	0.0173093	-71.7978	0.0194541	0.0169803
-69.7753	0.0209009	0.0189334	-69.7753	0.019984	0.0190769	-69.7753	0.0185042	0.0173704	-69.7753	0.0196031	0.0171017
-67.7528	0.0195828	0.0195728	-67.7528	0.0194245	0.0192512	-67.7528	0.0192641	0.0173927	-67.7528	0.0218031	0.0171935
-65.7303	0.0207518	0.0201349	-65.7303	0.0189357	0.0193282	-65.7303	0.0173145	0.017376	-65.7303	0.0218461	0.0172548
-63.7079	0.0221124	0.0206064	-63.7079	0.0206904	0.0193057	-63.7079	0.0162049	0.0173205	-63.7079	0.0208756	0.017285
-61.6854	0.0215479	0.020976	-61.6854	0.0193206	0.0191845	-61.6854	0.0157127	0.0172269	-61.6854	0.0185857	0.0172839
-59.6629	0.022175	0.0212347	-59.6629	0.0187945	0.0189677	-59.6629	0.0157008	0.0170964	-59.6629	0.0192553	0.0172515
-57.6404	0.0220989	0.0213759	-57.6404	0.0188339	0.0186611	-57.6404	0.0169995	0.0169305	-57.6404	0.0201636	0.017188
-55.618	0.0237816	0.0213961	-55.618	0.0180254	0.0182726	-55.618	0.0159174	0.0167313	-55.618	0.0181595	0.0170941
-53.5955	0.0228643	0.0212949	-53.5955	0.0176176	0.017812	-53.5955	0.0180535	0.016501	-53.5955	0.017295	0.0169706
-51.573	0.0198655	0.0210747	-51.573	0.0166111	0.0172908	-51.573	0.0171698	0.0162425	-51.573	0.018128	0.0168186
-49.5506	0.0206361	0.020741	-49.5506	0.0168183	0.0167212	-49.5506	0.0165295	0.0159586	-49.5506	0.0152094	0.0166396
-47.5281	0.0205679	0.0203022	-47.5281	0.0171255	0.0161161	-47.5281	0.0166748	0.0156526	-47.5281	0.0128274	0.0164351
-45.5056	0.0192518	0.0197689	-45.5056	0.0157971	0.0154885	-45.5056	0.0176401	0.0153277	-45.5056	0.0152755	0.0162068
-43.4831	0.0165398	0.0191536	-43.4831	0.0125233	0.0148509	-43.4831	0.0134847	0.0149874	-43.4831	0.0110603	0.0159569
-41.4607	0.0173774	0.0184704	-41.4607	0.0129211	0.014215	-41.4607	0.0142677	0.0146351	-41.4607	0.0111809	0.0156874
-39.4382	0.0152353	0.0177344	-39.4382	0.01277	0.0135916	-39.4382	0.0133331	0.0142743	-39.4382	0.0124304	0.0154005
-37.4157	0.0153968	0.0169609	-37.4157	0.0127862	0.0129898	-37.4157	0.0129091	0.0139083	-37.4157	0.0128293	0.0150985
-35.3933	0.0156863	0.0161653	-35.3933	0.0126384	0.0124175	-35.3933	0.0128147	0.0135404	-35.3933	0.0127068	0.014784
-33.3708	0.0132416	0.0153621	-33.3708	0.0115274	0.0118806	-33.3708	0.0124993	0.0131736	-33.3708	0.0130641	0.0144592
-31.3483	0.0122156	0.014565	-31.3483	0.0107757	0.0113836	-31.3483	0.0115343	0.0128109	-31.3483	0.012071	0.0141265
-29.3258	0.013003	0.0137861	-29.3258	0.0106213	0.0109294	-29.3258	0.0104581	0.0124547	-29.3258	0.011725	0.0137884
-27.3034	0.0124047	0.0130362	-27.3034	0.010623	0.0105194	-27.3034	0.0106687	0.0121074	-27.3034	0.0120918	0.0134471
-25.2809	0.0106497	0.0123238	-25.2809	0.01091	0.0101537	-25.2809	0.01024	0.0117712	-25.2809	0.0126235	0.0131048
-23.2584	0.0107889	0.011656	-23.2584	0.0103066	0.00983132	-23.2584	0.00980993	0.0114477	-23.2584	0.0123343	0.0127637
-21.236	0.0112806	0.0110376	-21.236	0.00992004	0.00955031	-21.236	0.0104738	0.0111386	-21.236	0.0122714	0.0124257
-19.2135	0.0137095	0.0104718	-19.2135	0.0111836	0.00930811	-19.2135	0.00964417	0.0108448	-19.2135	0.0115537	0.0120927
-17.191	0.015197	0.00996014	-17.191	0.0118407	0.00910163	-17.191	0.00997541	0.0105674	-17.191	0.011841	0.0117663
-15.1685	0.0183353	0.00950261	-15.1685	0.0121768	0.0089275	-15.1685	0.0101231	0.0103069	-15.1685	0.0150667	0.0114482
-13.1461	0.0133853	0.00909796	-13.1461	0.0107019	0.0087822	-13.1461	0.00994425	0.0100637	-13.1461	0.0143579	0.0111395
-11.1236	0.00935426	0.00874391	-11.1236	0.00938986	0.00866224	-11.1236	0.0114469	0.00983787	-11.1236	0.0131337	0.0108414
-9.10112	0.00775165	0.0084374	-9.10112	0.00853683	0.00856423	-9.10112	0.0121558	0.00962936	-9.10112	0.012216	0.010555
-7.07865	0.00795626	0.00817477	-7.07865	0.00868845	0.00848496	-7.07865	0.0112891	0.00943786	-7.07865	0.0119197	0.0102811
-5.05618	0.0073785	0.00795203	-5.05618	0.00787536	0.0084215	-5.05618	0.0117856	0.0092629	-5.05618	0.0132129	0.0100202
-3.03371	0.0071811	0.00776503	-3.03371	0.00772303	0.00837122	-3.03371	0.0120651	0.00910389	-3.03371	0.0120395	0.0097728
-1.01124	0.00789378	0.00760957	-1.01124	0.00842301	0.00833177	-1.01124	0.0130808	0.00896012	-1.01124	0.0112957	0.00953925
1.01124	0.00729814	0.00748161	1.01124	0.00784104	0.00830113	1.01124	0.013081	0.00883079	1.01124	0.0111129	0.00931967
3.03371	0.00797696	0.00737731	3.03371	0.00684653	0.00827757	3.03371	0.0099796	0.00871502	3.03371	0.0106339	0.00911409
5.05618	0.00988222	0.0072931	5.05618	0.00692401	0.00825963	5.05618	0.0100558	0.00861192	5.05618	0.010056	0.00892239
7.07865	0.00855419	0.00722577	7.07865	0.00836882	0.0082461	7.07865	0.0100723	0.00852055	7.07865	0.00991566	0.00874435
9.10112	0.00781203	0.00717244	9.10112	0.00777743	0.008236	9.10112	0.0113117	0.00843996	9.10112	0.00927953	0.00857965
11.1236	0.00783409	0.0071306	11.1236	0.00741452	0.00822853	11.1236	0.0100567	0.00836924	11.1236	0.0103353	0.00842788
13.1461	0.00757192	0.00709808	13.1461	0.00747609	0.00822306	13.1461	0.00825022	0.00830746	13.1461	0.00916888	0.00828857
15.1685	0.00760592	0.00707304	15.1685	0.0072822	0.00821909	15.1685	0.00770931	0.00825376	15.1685	0.00766907	0.00816118
17.191	0.00626943	0.00705394	17.191	0.00731997	0.00821624	17.191	0.00670657	0.00820731	17.191	0.00752724	0.00804514
19.2135	0.00715559	0.00703949	19.2135	0.00818203	0.00821421	19.2135	0.00681257	0.0081673	19.2135	0.00731667	0.00793982
21.236	0.00706674	0.00702868	21.236	0.00719219	0.00821278	21.236	0.00669609	0.00813302	21.236	0.00791698	0.0078446
23.2584	0.00713404	0.00702065	23.2584	0.00733167	0.00821178	23.2584	0.00567914	0.00810377	23.2584	0.00725152	0.00775881
25.2809	0.00713058	0.00701475	25.2809	0.00677459	0.00821109	25.2809	0.00464381	0.00807894	25.2809	0.00603802	0.00768182
27.3034	0.00762664	0.00701044	27.3034	0.00788501	0.00821062	27.3034	0.00426169	0.00805795	27.3034	0.00600051	0.00761296
29.3258	0.00732362	0.00700734	29.3258	0.00829422	0.0082103	29.3258	0.00455807	0.00804029	29.3258	0.00586374	0.0075516
31.3483	0.00886475	0.00700512	31.3483	0.00853959	0.00821008	31.3483	0.00481245	0.0080255	31.3483	0.00557238	0.00749712
33.3708	0.00954803	0.00700354	33.3708	0.0074143	0.00820994	33.3708	0.00468833	0.00801317	33.3708	0.00597711	0.00744892
35.3933	0.0069164	0.00700243	35.3933	0.00653704	0.00820984	35.3933	0.00528827	0.00800294	35.3933	0.00650273	0.00740642
37.4157	0.006673	0.00700166	37.4157	0.00693828	0.00820978	37.4157	0.0061939	0.00799448	37.4157	0.00619957	0.00736909
39.4382	0.00646882	0.00700112	39.4382	0.00610326	0.00820974	39.4382	0.00618348	0.00798753	39.4382	0.00539253	0.00733641
41.4607	0.0065469	0.00700076	41.4607	0.00542826	0.00820971	41.4607	0.00582688	0.00798184	41.4607	0.00478327	0.0073079
43.4831	0.00545987	0.00700051	43.4831	0.00543695	0.0082097	43.4831	0.00480113	0.0079772	43.4831	0.00527846	0.00728312
45.5056	0.00592704	0.00700034	45.5056	0.00616957	0.00820969	45.5056	0.00598719	0.00797344	45.5056	0.00577183	0.00726165
47.5281	0.0049156	0.00700023	47.5281	0.00610957	0.00820968	47.5281	0.00616171	0.0079704	47.5281	0.00542788	0.00724311
49.5506	0.00536504	0.00700016	49.5506	0.00710129	0.00820968	49.5506	0.00607597	0.00796795	49.5506	0.00501339	0.00722716
51.573	0.00514071	0.00700011	51.573	0.00712479	0.00820967	51.573	0.00653734	0.00796599	51.573	0.00507603	0.00721348
53.5955	0.00538956	0.00700008	53.5955	0.00680879	0.00820967	53.5955	0.00635119	0.00796443	53.5955	0.00521228	0.0072018
55.618	0.00555167	0.00700006	55.618	0.0065457	0.00820967	55.618	0.00604401	0.00796319	55.618	0.00593464	0.00719184
57.6404	0.00533079	0.00700005	57.6404	0.00655317	0.00820967	57.6404	0.0056598	0.00796222	57.6404	0.00605875	0.0071834
59.6629	0.00530459	0.00700004	59.6629	0.00664136	0.00820967	59.6629	0.00602527	0.00796145	59.6629	0.00586235	0.00717625
61.6854	0.00509691	0.00700003	61.6854	0.0077545	0.00820967	61.6854	0.00634819	0.00796084	61.6854	0.00617188	0.00717023
63.7079	0.00598641	0.00700003	63.7079	0.00905141	0.00820967	63.7079	0.00796183	0.00796037	63.7079	0.00585421	0.00716517
65.7303	0.00519484	0.00700003	65.7303	0.00895745	0.00820967	65.7303	0.00818667	0.00796001	65.7303	0.0061075	0.00716093
67.7528	0.00535491	0.00700003	67.7528	0.0100006	0.00820967	67.7528	0.00874398	0.00795973	67.7528	0.00756631	0.00715739
69.7753	0.0053554	0.00700003	69.7753	0.0096405	0.00820967	69.7753	0.00883244	0.00795951	69.7753	0.00705376	0.00715445
71.7978	0.00585821	0.00700003	71.7978	0.0084382	0.00820967	71.7978	0.00890703	0.00795934	71.7978	0.00609342	0.00715201
73.8202	0.00683692	0.00700003	73.8202	0.0092047	0.00820967	73.8202	0.00849044	0.00795922	73.8202	0.00708872	0.00714999
75.8427	0.00659306	0.00700003	75.8427	0.00977851	0.00820967	75.8427	0.00942091	0.00795912	75.8427	0.00804861	0.00714833
77.8652	0.00711515	0.00700003	77.8652	0.00989175	0.00820967	77.8652	0.0102957	0.00795905	77.8652	0.00908508	0.00714697
79.8876	0.00757163	0.00700003	79.8876	0.00902035	0.00820967	79.8876	0.0106039	0.00795899	79.8876	0.00943787	0.00714586
81.9101	0.0071906	0.00700003	81.9101	0.00960638	0.00820967	81.9101	0.0116473	0.00795895	81.9101	0.00800924	0.00714495
83.9326	0.00787382	0.00700003	83.9326	0.0102904	0.00820967	83.9326	0.0115954	0.00795892	83.9326	0.0098859	0.00714421
85.9551	0.00766469	0.00700003	85.9551	0.0126964	0.00820967	85.9551	0.0127991	0.0079589	85.9551	0.011038	0.00714361
87.9775	0.00679112	0.00700003	87.9775	0.0107327	0.00820967	87.9775	0.0110971	0.00795888	87.9775	0.00905606	0.00714313
90	0.0127296	0.00700003	90	0.0153333	0.00820967	90	0.0175634	0.00795887	90	0.015965	0.00714274
Exp 1- Random
Random 02			Random 06			Random 11			Random 12			Random 21			Random 31
Direction (°)	Exp1_random02	Exp1_random02-fit	Direction (°)	Exp1_random06	Exp1_random06-fit	Direction (°)	Exp1_random11	Exp1_random11-fit	Direction (°)	Exp1_random12	Exp1_random12-fit	Direction (°)	Exp1_random21	Exp1_random21-fit	Direction (°)	Exp1_random31	Exp1_random31-fit
-90	0.00996432	0.00805292	-90	0.0102797	0.00882838	-90	0.0130915	0.00809533	-90	0.00970814	0.00786188	-90	0.00990936	0.00931812	-90	0.00687769	0.0087889
-87.9775	0.00725117	0.00805823	-87.9775	0.00714989	0.0089387	-87.9775	0.00722927	0.00810019	-87.9775	0.00748373	0.00786226	-87.9775	0.00729871	0.00931847	-87.9775	0.00558348	0.00879151
-85.9551	0.00842433	0.00806502	-85.9551	0.00863654	0.00905028	-85.9551	0.00937345	0.008106	-85.9551	0.0090273	0.00786274	-85.9551	0.00808612	0.00931894	-85.9551	0.00657594	0.00879476
-83.9326	0.00828751	0.00807361	-83.9326	0.00862223	0.009163	-83.9326	0.010613	0.00811293	-83.9326	0.00887624	0.00786336	-83.9326	0.0110465	0.00931959	-83.9326	0.00699305	0.00879877
-81.9101	0.0078563	0.00808444	-81.9101	0.00780913	0.00927671	-81.9101	0.0107371	0.00812114	-81.9101	0.00980068	0.00786415	-81.9101	0.0109056	0.00932045	-81.9101	0.00868552	0.00880368
-79.8876	0.00765398	0.008098	-79.8876	0.00922985	0.00939126	-79.8876	0.00896079	0.00813085	-79.8876	0.00964346	0.00786515	-79.8876	0.0103468	0.00932162	-79.8876	0.00914283	0.00880969
-77.8652	0.00710223	0.00811484	-77.8652	0.00867689	0.00950651	-77.8652	0.00904394	0.00814227	-77.8652	0.00854987	0.0078664	-77.8652	0.00995719	0.00932317	-77.8652	0.00941318	0.008817
-75.8427	0.00668476	0.00813564	-75.8427	0.00835434	0.00962229	-75.8427	0.00924207	0.00815567	-75.8427	0.00811048	0.00786799	-75.8427	0.00976684	0.00932523	-75.8427	0.00852633	0.00882584
-73.8202	0.00640297	0.00816116	-73.8202	0.00796263	0.00973842	-73.8202	0.00807906	0.00817132	-73.8202	0.00732443	0.00786997	-73.8202	0.0102809	0.00932792	-73.8202	0.00901389	0.00883649
-71.7978	0.00706221	0.00819226	-71.7978	0.00872657	0.00985475	-71.7978	0.00778578	0.00818953	-71.7978	0.00747362	0.00787243	-71.7978	0.0110011	0.00933143	-71.7978	0.00973762	0.00884924
-69.7753	0.00737941	0.0082299	-69.7753	0.00885883	0.00997109	-69.7753	0.00751384	0.00821064	-69.7753	0.0076827	0.00787549	-69.7753	0.00987722	0.00933598	-69.7753	0.0100172	0.00886445
-67.7528	0.0067016	0.00827517	-67.7528	0.00904375	0.0100872	-67.7528	0.00779263	0.008235	-67.7528	0.00877499	0.00787926	-67.7528	0.00871981	0.00934181	-67.7528	0.0102734	0.00888248
-65.7303	0.00695326	0.00832922	-65.7303	0.00977153	0.010203	-65.7303	0.00852598	0.00826301	-65.7303	0.00877625	0.00788389	-65.7303	0.00750673	0.00934926	-65.7303	0.00826732	0.00890377
-63.7079	0.00735259	0.00839334	-63.7079	0.0105161	0.0103183	-63.7079	0.0082478	0.00829509	-63.7079	0.00910063	0.00788955	-63.7079	0.00824307	0.00935868	-63.7079	0.00914942	0.00892876
-61.6854	0.00751362	0.00846888	-61.6854	0.0103557	0.0104328	-61.6854	0.00695168	0.00833169	-61.6854	0.008815	0.00789644	-61.6854	0.00783537	0.00937052	-61.6854	0.0105313	0.00895797
-59.6629	0.00793647	0.00855724	-59.6629	0.0114929	0.0105463	-59.6629	0.00713578	0.00837326	-59.6629	0.00823934	0.0079048	-59.6629	0.00852518	0.00938528	-59.6629	0.0109269	0.00899191
-57.6404	0.00791462	0.00865989	-57.6404	0.0114571	0.0106587	-57.6404	0.00679726	0.0084203	-57.6404	0.00724323	0.00791488	-57.6404	0.00913387	0.00940356	-57.6404	0.0108466	0.00903116
-55.618	0.00777707	0.0087783	-55.618	0.0115602	0.0107697	-55.618	0.00699448	0.0084733	-55.618	0.00723256	0.00792698	-55.618	0.0129267	0.00942602	-55.618	0.0102406	0.00907631
-53.5955	0.00898177	0.00891392	-53.5955	0.0123475	0.0108792	-53.5955	0.00673272	0.00853279	-53.5955	0.00741069	0.00794145	-53.5955	0.014649	0.00945341	-53.5955	0.0124987	0.00912798
-51.573	0.00905741	0.00906813	-51.573	0.0116726	0.0109869	-51.573	0.00734565	0.00859927	-51.573	0.00681748	0.00795867	-51.573	0.0132558	0.00948656	-51.573	0.0135643	0.0091868
-49.5506	0.00971079	0.00924219	-49.5506	0.0120923	0.0110926	-49.5506	0.00699071	0.00867326	-49.5506	0.00815604	0.00797907	-49.5506	0.0116976	0.00952638	-49.5506	0.0138456	0.0092534
-47.5281	0.00966036	0.00943721	-47.5281	0.0111818	0.0111961	-47.5281	0.00599873	0.00875525	-47.5281	0.00639379	0.00800312	-47.5281	0.00967919	0.00957384	-47.5281	0.0127522	0.00932842
-45.5056	0.0119901	0.00965406	-45.5056	0.0137106	0.0112972	-45.5056	0.0082714	0.00884574	-45.5056	0.00785964	0.00803134	-45.5056	0.00923173	0.00962998	-45.5056	0.0123233	0.00941246
-43.4831	0.00969604	0.00989335	-43.4831	0.0106794	0.0113958	-43.4831	0.00744341	0.00894517	-43.4831	0.00666212	0.00806431	-43.4831	0.00698188	0.00969585	-43.4831	0.0103304	0.00950608
-41.4607	0.0111918	0.0101553	-41.4607	0.0123452	0.0114915	-41.4607	0.00955409	0.00905395	-41.4607	0.00680415	0.00810264	-41.4607	0.00783588	0.00977253	-41.4607	0.0109667	0.00960981
-39.4382	0.0121486	0.0104399	-39.4382	0.0134528	0.0115843	-39.4382	0.0102574	0.00917244	-39.4382	0.0079115	0.00814699	-39.4382	0.00868414	0.0098611	-39.4382	0.0124682	0.00972409
-37.4157	0.0137135	0.0107464	-37.4157	0.0140645	0.0116738	-37.4157	0.0105852	0.00930093	-37.4157	0.00781615	0.00819806	-37.4157	0.0090391	0.00996257	-37.4157	0.0119598	0.00984929
-35.3933	0.0127224	0.0110738	-35.3933	0.0120118	0.01176	-35.3933	0.00910248	0.00943965	-35.3933	0.00806892	0.0082566	-35.3933	0.0078053	0.0100779	-35.3933	0.00935608	0.00998564
-33.3708	0.0112442	0.0114204	-33.3708	0.0107061	0.0118427	-33.3708	0.0086227	0.00958871	-33.3708	0.00800477	0.00832336	-33.3708	0.00900651	0.0102078	-33.3708	0.0102469	0.0101333
-31.3483	0.0113939	0.0117842	-31.3483	0.0112121	0.0119216	-31.3483	0.0091344	0.00974815	-31.3483	0.00885737	0.00839915	-31.3483	0.011817	0.0103529	-31.3483	0.00959176	0.0102922
-29.3258	0.0126146	0.0121624	-29.3258	0.01167	0.0119966	-29.3258	0.0100044	0.00991789	-29.3258	0.0082705	0.00848475	-29.3258	0.0135704	0.0105136	-29.3258	0.00910863	0.0104622
-27.3034	0.0133713	0.0125517	-27.3034	0.0131318	0.0120675	-27.3034	0.00902751	0.0100977	-27.3034	0.00787978	0.00858097	-27.3034	0.0140301	0.0106901	-27.3034	0.0116443	0.0106429
-25.2809	0.012709	0.0129484	-25.2809	0.0122044	0.0121341	-25.2809	0.00837388	0.0102873	-25.2809	0.00745723	0.00868857	-25.2809	0.012636	0.0108821	-25.2809	0.0125256	0.0108338
-23.2584	0.0133171	0.0133481	-23.2584	0.0118246	0.0121964	-23.2584	0.0100263	0.0104862	-23.2584	0.00818152	0.00880831	-23.2584	0.0120411	0.0110891	-23.2584	0.0109487	0.0110341
-21.236	0.0129599	0.0137461	-21.236	0.0119593	0.0122542	-21.236	0.010554	0.0106937	-21.236	0.00856809	0.00894086	-21.236	0.010666	0.01131	-21.236	0.00899733	0.0112428
-19.2135	0.0123122	0.0141374	-19.2135	0.0115561	0.0123073	-19.2135	0.00994216	0.0109091	-19.2135	0.00842114	0.00908686	-19.2135	0.0103964	0.0115435	-19.2135	0.00891887	0.0114588
-17.191	0.012952	0.0145167	-17.191	0.0120024	0.0123557	-17.191	0.0104432	0.0111314	-17.191	0.00846502	0.00924683	-17.191	0.0108079	0.0117878	-17.191	0.00790395	0.0116807
-15.1685	0.0141874	0.0148786	-15.1685	0.0128083	0.0123991	-15.1685	0.0107005	0.0113597	-15.1685	0.00917952	0.00942117	-15.1685	0.0119971	0.0120406	-15.1685	0.0073197	0.011907
-13.1461	0.0154767	0.0152178	-13.1461	0.0132037	0.0124376	-13.1461	0.0108092	0.0115926	-13.1461	0.00930288	0.00961016	-13.1461	0.0133566	0.0122993	-13.1461	0.00853512	0.0121358
-11.1236	0.0150234	0.0155289	-11.1236	0.0136233	0.012471	-11.1236	0.0113357	0.0118289	-11.1236	0.00947126	0.00981391	-11.1236	0.0138614	0.0125607	-11.1236	0.00950209	0.0123652
-9.10112	0.0169646	0.015807	-9.10112	0.0144408	0.0124993	-9.10112	0.0119404	0.012067	-9.10112	0.00930898	0.0100324	-9.10112	0.0134312	0.0128215	-9.10112	0.0116991	0.0125931
-7.07865	0.0144528	0.0160474	-7.07865	0.0112688	0.0125223	-7.07865	0.0117677	0.0123053	-7.07865	0.0098795	0.0102652	-7.07865	0.011115	0.013078	-7.07865	0.0118462	0.0128174
-5.05618	0.0147226	0.0162461	-5.05618	0.0116503	0.0125401	-5.05618	0.0153307	0.0125422	-5.05618	0.0100003	0.0105121	-5.05618	0.0119396	0.0133264	-5.05618	0.0116616	0.0130357
-3.03371	0.0142198	0.0163997	-3.03371	0.0109308	0.0125525	-3.03371	0.0144316	0.0127758	-3.03371	0.0108531	0.0107721	-3.03371	0.0118355	0.0135626	-3.03371	0.0109288	0.0132458
-1.01124	0.0164309	0.0165054	-1.01124	0.012514	0.0125596	-1.01124	0.0164855	0.0130043	-1.01124	0.0115609	0.0110444	-1.01124	0.0138782	0.0137828	-1.01124	0.0164325	0.0134452
1.01124	0.0170084	0.0165615	1.01124	0.0129051	0.0125614	1.01124	0.0180744	0.0132258	1.01124	0.0111321	0.0113278	1.01124	0.0143857	0.013983	1.01124	0.0180977	0.0136318
3.03371	0.0166941	0.0165668	3.03371	0.0136964	0.0125578	3.03371	0.0158187	0.0134384	3.03371	0.0111499	0.0116207	3.03371	0.0132796	0.0141597	3.03371	0.0142496	0.0138032
5.05618	0.0183687	0.0165214	5.05618	0.0156041	0.0125488	5.05618	0.0148477	0.0136402	5.05618	0.0116292	0.0119215	5.05618	0.0137573	0.0143096	5.05618	0.0173281	0.0139574
7.07865	0.0166099	0.016426	7.07865	0.0126612	0.0125345	7.07865	0.0146124	0.0138294	7.07865	0.0113703	0.0122281	7.07865	0.0136084	0.0144297	7.07865	0.0177291	0.0140925
9.10112	0.0175162	0.0162823	9.10112	0.0121469	0.0125149	9.10112	0.014618	0.0140042	9.10112	0.0126413	0.0125385	9.10112	0.0154275	0.0145178	9.10112	0.0172197	0.0142066
11.1236	0.0180635	0.0160928	11.1236	0.0120262	0.0124901	11.1236	0.0150522	0.014163	11.1236	0.0141723	0.0128502	11.1236	0.0158985	0.0145722	11.1236	0.019116	0.0142985
13.1461	0.0165855	0.0158608	13.1461	0.0116138	0.01246	13.1461	0.0133309	0.0143041	13.1461	0.0162167	0.0131606	13.1461	0.0152969	0.0145916	13.1461	0.0158857	0.0143667
15.1685	0.0152465	0.0155903	15.1685	0.0116693	0.0124249	15.1685	0.0146894	0.0144261	15.1685	0.0160118	0.0134669	15.1685	0.0146249	0.0145758	15.1685	0.0147118	0.0144106
17.191	0.0142906	0.0152858	17.191	0.0115253	0.0123847	17.191	0.0160307	0.0145279	17.191	0.016282	0.0137664	17.191	0.0147273	0.0145251	17.191	0.0131939	0.0144293
19.2135	0.0153103	0.0149521	19.2135	0.0121944	0.0123395	19.2135	0.0150139	0.0146084	19.2135	0.0152918	0.0140562	19.2135	0.015176	0.0144405	19.2135	0.0130021	0.0144227
21.236	0.0153589	0.0145945	21.236	0.0125085	0.0122895	21.236	0.0132906	0.0146667	21.236	0.0147001	0.0143332	21.236	0.0143228	0.0143236	21.236	0.0128505	0.014391
23.2584	0.0156026	0.0142184	23.2584	0.0129098	0.0122348	23.2584	0.012227	0.0147023	23.2584	0.0135668	0.0145946	23.2584	0.0131941	0.0141767	23.2584	0.0127544	0.0143344
25.2809	0.0139596	0.0138291	25.2809	0.0124207	0.0121754	25.2809	0.011376	0.0147147	25.2809	0.0132278	0.0148376	25.2809	0.0117716	0.0140026	25.2809	0.0114071	0.0142538
27.3034	0.0143492	0.0134321	27.3034	0.0128757	0.0121116	27.3034	0.0114969	0.0147038	27.3034	0.0127632	0.0150594	27.3034	0.0133719	0.0138047	27.3034	0.0109009	0.0141503
29.3258	0.0132584	0.0130324	29.3258	0.0116629	0.0120434	29.3258	0.0108838	0.0146699	29.3258	0.0125632	0.0152574	29.3258	0.0120567	0.0135864	29.3258	0.0109272	0.0140251
31.3483	0.0118092	0.0126348	31.3483	0.0113081	0.0119711	31.3483	0.011878	0.0146131	31.3483	0.0133858	0.0154294	31.3483	0.0121725	0.0133517	31.3483	0.0108917	0.0138799
33.3708	0.0114612	0.0122436	33.3708	0.0104266	0.0118947	33.3708	0.0135505	0.0145341	33.3708	0.0147571	0.0155733	33.3708	0.0125847	0.0131044	33.3708	0.0104039	0.0137165
35.3933	0.0109293	0.0118627	35.3933	0.00997854	0.0118145	35.3933	0.0136959	0.0144337	35.3933	0.0162221	0.0156874	35.3933	0.0141662	0.0128485	35.3933	0.0108954	0.013537
37.4157	0.0114775	0.0114957	37.4157	0.0108913	0.0117306	37.4157	0.014627	0.014313	37.4157	0.0188542	0.0157703	37.4157	0.0147308	0.012588	37.4157	0.0130293	0.0133435
39.4382	0.0110722	0.0111452	39.4382	0.0117797	0.0116433	39.4382	0.0131103	0.0141732	39.4382	0.019427	0.0158209	39.4382	0.0150135	0.0123265	39.4382	0.0137465	0.0131382
41.4607	0.0100503	0.0108136	41.4607	0.0114471	0.0115526	41.4607	0.0141139	0.0140156	41.4607	0.0179509	0.0158387	41.4607	0.0167245	0.0120674	41.4607	0.0165768	0.0129236
43.4831	0.0092823	0.0105026	43.4831	0.0105157	0.0114588	43.4831	0.0146461	0.0138418	43.4831	0.0177802	0.0158234	43.4831	0.0122257	0.0118138	43.4831	0.0125797	0.0127019
45.5056	0.00930934	0.0102134	45.5056	0.0107341	0.011362	45.5056	0.0168894	0.0136535	45.5056	0.0177693	0.0157752	45.5056	0.0141567	0.0115685	45.5056	0.0206285	0.0124754
47.5281	0.00883026	0.0099466	47.5281	0.0100904	0.0112626	47.5281	0.0173308	0.0134525	47.5281	0.0157146	0.0156947	47.5281	0.0105548	0.0113338	47.5281	0.0125694	0.0122465
49.5506	0.00889533	0.00970255	49.5506	0.0103821	0.0111606	49.5506	0.0152632	0.0132406	49.5506	0.0133831	0.0155829	49.5506	0.0103855	0.0111115	49.5506	0.018152	0.0120171
51.573	0.00870168	0.00948101	51.573	0.0100028	0.0110563	51.573	0.0126516	0.0130196	51.573	0.0125899	0.0154412	51.573	0.0105888	0.010903	51.573	0.0144753	0.0117894
53.5955	0.00815699	0.00928146	53.5955	0.00957172	0.0109499	53.5955	0.0118149	0.0127915	53.5955	0.0120991	0.0152712	53.5955	0.0104581	0.0107094	53.5955	0.0127254	0.0115652
55.618	0.00875992	0.00910308	55.618	0.00899634	0.0108415	55.618	0.0111721	0.0125582	55.618	0.0110729	0.015075	55.618	0.0104998	0.0105313	55.618	0.0111204	0.0113462
57.6404	0.00876874	0.00894479	57.6404	0.00932481	0.0107315	57.6404	0.0121058	0.0123215	57.6404	0.0122736	0.014855	57.6404	0.00985537	0.0103689	57.6404	0.0114702	0.0111338
59.6629	0.00835607	0.00880537	59.6629	0.00965006	0.01062	59.6629	0.0123629	0.0120833	59.6629	0.0126823	0.0146135	59.6629	0.00870868	0.0102222	59.6629	0.0140874	0.0109293
61.6854	0.00854985	0.00868345	61.6854	0.0101324	0.0105072	61.6854	0.0127872	0.0118451	61.6854	0.0115919	0.0143534	61.6854	0.0076112	0.0100907	61.6854	0.0111995	0.0107337
63.7079	0.00963214	0.00857761	63.7079	0.0110435	0.0103933	63.7079	0.0118207	0.0116087	63.7079	0.0126848	0.0140774	63.7079	0.00756758	0.00997394	63.7079	0.0105973	0.0105481
65.7303	0.0099466	0.00848636	65.7303	0.0120674	0.0102785	65.7303	0.0109442	0.0113754	65.7303	0.0118752	0.0137885	65.7303	0.00695941	0.00987107	65.7303	0.00892913	0.0103728
67.7528	0.0103545	0.00840824	67.7528	0.0121276	0.0101631	67.7528	0.0119846	0.0111468	67.7528	0.0143438	0.0134897	67.7528	0.00748184	0.0097812	67.7528	0.00838249	0.0102085
69.7753	0.0108911	0.00834184	69.7753	0.011707	0.0100471	69.7753	0.0136057	0.010924	69.7753	0.0163532	0.0131837	69.7753	0.008439	0.00970332	69.7753	0.00763434	0.0100555
71.7978	0.0104278	0.00828577	71.7978	0.0116165	0.00993088	71.7978	0.0144595	0.0107081	71.7978	0.0186182	0.0128735	71.7978	0.00740077	0.00963637	71.7978	0.00774229	0.00991366
73.8202	0.00901724	0.00823876	73.8202	0.0101713	0.00981453	73.8202	0.0122189	0.0105	73.8202	0.0208465	0.0125618	73.8202	0.00831058	0.00957927	73.8202	0.00772458	0.00978311
75.8427	0.0085937	0.0081996	75.8427	0.00970588	0.00969825	75.8427	0.00906307	0.0103006	75.8427	0.0187218	0.0122513	75.8427	0.00789809	0.00953096	75.8427	0.00720575	0.0096636
77.8652	0.00880056	0.00816721	77.8652	0.0102052	0.00958222	77.8652	0.0076669	0.0101103	77.8652	0.0129044	0.0119443	77.8652	0.00850619	0.00949039	77.8652	0.00731453	0.00955483
79.8876	0.00957183	0.00814059	79.8876	0.0114688	0.0094666	79.8876	0.00697651	0.00992982	79.8876	0.00921641	0.011643	79.8876	0.0108129	0.00945658	79.8876	0.00716016	0.0094564
81.9101	0.00789117	0.00811886	81.9101	0.0102427	0.00935158	81.9101	0.00796213	0.00975939	81.9101	0.00961294	0.0113494	81.9101	0.010613	0.00942863	81.9101	0.00688616	0.0093678
83.9326	0.00821922	0.00810125	83.9326	0.00999228	0.0092373	83.9326	0.00839675	0.00959925	83.9326	0.00936302	0.0110653	83.9326	0.00994823	0.0094057	83.9326	0.00835093	0.00928851
85.9551	0.00768179	0.00808705	85.9551	0.00923618	0.00912391	85.9551	0.00852005	0.00944948	85.9551	0.00814052	0.0107921	85.9551	0.00996972	0.00938701	85.9551	0.00689494	0.00921792
87.9775	0.0069318	0.00807569	87.9775	0.00771466	0.00901158	87.9775	0.00860022	0.00931006	87.9775	0.00791391	0.0105311	87.9775	0.00823458	0.00937191	87.9775	0.00569575	0.00915542
90	0.00996432	0.00806666	90	0.0102797	0.00890042	90	0.0130915	0.00918088	90	0.00970814	0.0102833	90	0.00990936	0.00935979	90	0.00687769	0.00910038
Exp 2- Aligned
Aligned 01			Aligned 11			Aligned 21
Direction (°)	Exp2_aligned01	Exp2_aligned01-fit	Direction (°)	Exp2_aligned11	Exp2_aligned11-fit	Direction (°)	Exp2_aligned21	Exp2_aligned21-fit
-90	0.00332077	0.00412714	-90	0.00268623	0.00300547	-90	0.0107385	0.00405884
-87.9775	0.00255167	0.00416034	-87.9775	0.002849	0.00321065	-87.9775	0.00481324	0.00446257
-85.9551	0.00391541	0.00421768	-85.9551	0.00327041	0.00350117	-85.9551	0.00572774	0.00499657
-83.9326	0.00418029	0.00431384	-83.9326	0.00337123	0.00390405	-83.9326	0.0073349	0.00568936
-81.9101	0.00427925	0.00447025	-81.9101	0.00384149	0.00445111	-81.9101	0.00828715	0.00657075
-79.8876	0.00466187	0.00471701	-79.8876	0.00522408	0.00517825	-79.8876	0.00837116	0.00766994
-77.8652	0.00524992	0.00509444	-77.8652	0.00494906	0.00612402	-77.8652	0.010709	0.00901313
-75.8427	0.00586215	0.00565398	-75.8427	0.00565615	0.00732734	-75.8427	0.0153954	0.0106206
-73.8202	0.00794561	0.00645757	-73.8202	0.00821132	0.00882423	-73.8202	0.0149418	0.0125035
-71.7978	0.012947	0.00757497	-71.7978	0.0157174	0.0106438	-71.7978	0.0126795	0.0146605
-69.7753	0.0151609	0.00907832	-69.7753	0.0316392	0.0128038	-69.7753	0.0150262	0.0170749
-67.7528	0.012957	0.0110337	-67.7528	0.0272398	0.0153053	-67.7528	0.0159773	0.0197123
-65.7303	0.0104264	0.0134897	-65.7303	0.0235853	0.018129	-65.7303	0.0190384	0.0225194
-63.7079	0.0122276	0.0164648	-63.7079	0.0294012	0.0212312	-63.7079	0.0269585	0.0254245
-61.6854	0.0173309	0.019934	-61.6854	0.0219778	0.0245419	-61.6854	0.0262171	0.028339
-59.6629	0.0235289	0.0238186	-59.6629	0.025087	0.0279659	-59.6629	0.0259136	0.0311619
-57.6404	0.0227542	0.027981	-57.6404	0.0260496	0.0313851	-57.6404	0.0349074	0.0337846
-55.618	0.0273463	0.0322272	-55.618	0.0295838	0.0346648	-55.618	0.0518304	0.0360976
-53.5955	0.0310268	0.0363183	-53.5955	0.0337598	0.0376617	-53.5955	0.0504369	0.0379987
-51.573	0.0412155	0.0399907	-51.573	0.0326127	0.0402341	-51.573	0.0345803	0.0393994
-49.5506	0.0540586	0.0429837	-49.5506	0.0353113	0.0422529	-49.5506	0.034034	0.0402327
-47.5281	0.0571559	0.0450693	-47.5281	0.0341033	0.0436122	-47.5281	0.0311528	0.0404576
-45.5056	0.0499447	0.0460814	-45.5056	0.0407355	0.0442385	-45.5056	0.036103	0.0400631
-43.4831	0.0404783	0.0459372	-43.4831	0.0386224	0.0440976	-43.4831	0.0351309	0.0390687
-41.4607	0.0397033	0.0446486	-41.4607	0.0459151	0.0431971	-41.4607	0.0265234	0.0375228
-39.4382	0.0362084	0.0423204	-39.4382	0.0539804	0.0415863	-39.4382	0.0247358	0.035499
-37.4157	0.0426398	0.0391366	-37.4157	0.0409918	0.0393514	-37.4157	0.0354504	0.0330902
-35.3933	0.0405189	0.0353358	-35.3933	0.0589012	0.0366079	-35.3933	0.0626128	0.0304016
-33.3708	0.0264544	0.0311824	-33.3708	0.0350197	0.0334909	-33.3708	0.0403546	0.0275429
-31.3483	0.0203562	0.0269361	-31.3483	0.0489474	0.0301438	-31.3483	0.0275255	0.0246213
-29.3258	0.0162772	0.0228263	-29.3258	0.0273983	0.026708	-29.3258	0.024447	0.021735
-27.3034	0.0169247	0.0190339	-27.3034	0.0198853	0.0233128	-27.3034	0.0165981	0.0189681
-25.2809	0.0174662	0.0156817	-25.2809	0.0113195	0.0200686	-25.2809	0.00902193	0.0163875
-23.2584	0.0192863	0.0128345	-23.2584	0.00671185	0.0170615	-23.2584	0.0074183	0.0140411
-21.236	0.0154479	0.0105053	-21.236	0.00528792	0.0143519	-21.236	0.00755312	0.0119585
-19.2135	0.0122875	0.00866709	-19.2135	0.00336693	0.0119741	-19.2135	0.006087	0.0101518
-17.191	0.0127826	0.00726567	-17.191	0.00271025	0.00993973	-17.191	0.00454676	0.00861845
-15.1685	0.0110071	0.00623257	-15.1685	0.00249309	0.00824087	-15.1685	0.00348575	0.00734463
-13.1461	0.0111948	0.00549555	-13.1461	0.00238916	0.00685515	-13.1461	0.00314881	0.00630807
-11.1236	0.0132942	0.0049864	-11.1236	0.00225404	0.0057504	-11.1236	0.00300917	0.00548148
-9.10112	0.0100723	0.00464561	-9.10112	0.00239141	0.00488912	-9.10112	0.00278599	0.00483526
-7.07865	0.0072809	0.00442452	-7.07865	0.00231915	0.00423219	-7.07865	0.00269361	0.00433982
-5.05618	0.00626496	0.00428543	-5.05618	0.00218334	0.00374181	-5.05618	0.00273401	0.00396719
-3.03371	0.00522748	0.00420057	-3.03371	0.00200885	0.00338346	-3.03371	0.0027538	0.00369221
-1.01124	0.00480169	0.00415033	-1.01124	0.00201375	0.00312701	-1.01124	0.00307183	0.00349305
1.01124	0.00417806	0.00412147	1.01124	0.0019558	0.00294726	1.01124	0.00290934	0.00335146
3.03371	0.00355343	0.00410537	3.03371	0.00187793	0.00282383	3.03371	0.00257078	0.00325263
5.05618	0.00364023	0.00409666	5.05618	0.0017811	0.00274079	5.05618	0.00241425	0.0031849
7.07865	0.00346301	0.00409208	7.07865	0.0018366	0.00268603	7.07865	0.00238159	0.00313932
9.10112	0.00371326	0.00408974	9.10112	0.00178105	0.00265065	9.10112	0.00233171	0.00310919
11.1236	0.00397428	0.00408859	11.1236	0.00174971	0.00262824	11.1236	0.00232513	0.00308962
13.1461	0.00444028	0.00408803	13.1461	0.00178221	0.00261432	13.1461	0.00218463	0.00307715
15.1685	0.00519319	0.00408777	15.1685	0.00178866	0.00260585	15.1685	0.00209073	0.00306933
17.191	0.00586307	0.00408765	17.191	0.00193514	0.00260079	17.191	0.00206504	0.00306452
19.2135	0.00873454	0.0040876	19.2135	0.00218779	0.00259783	19.2135	0.00197708	0.00306161
21.236	0.00980293	0.00408757	21.236	0.00251288	0.00259613	21.236	0.00190097	0.00305988
23.2584	0.00991655	0.00408756	23.2584	0.00274034	0.00259517	23.2584	0.00192681	0.00305887
25.2809	0.00845668	0.00408756	25.2809	0.00414679	0.00259464	25.2809	0.00189384	0.00305829
27.3034	0.00411523	0.00408756	27.3034	0.00609385	0.00259436	27.3034	0.00217516	0.00305796
29.3258	0.00310202	0.00408756	29.3258	0.00457298	0.00259421	29.3258	0.00226152	0.00305778
31.3483	0.00269564	0.00408756	31.3483	0.00485175	0.00259413	31.3483	0.00308777	0.00305768
33.3708	0.00231249	0.00408756	33.3708	0.00550916	0.00259409	33.3708	0.00439244	0.00305763
35.3933	0.00204922	0.00408756	35.3933	0.00472128	0.00259407	35.3933	0.00504768	0.0030576
37.4157	0.00173992	0.00408756	37.4157	0.00510284	0.00259406	37.4157	0.00410301	0.00305759
39.4382	0.00155805	0.00408756	39.4382	0.00312478	0.00259405	39.4382	0.00330619	0.00305758
41.4607	0.00141134	0.00408756	41.4607	0.00244777	0.00259405	41.4607	0.00278389	0.00305757
43.4831	0.00143284	0.00408756	43.4831	0.00235688	0.00259405	43.4831	0.00248805	0.00305757
45.5056	0.00167099	0.00408756	45.5056	0.00325207	0.00259405	45.5056	0.00246138	0.00305757
47.5281	0.00164259	0.00408756	47.5281	0.00374633	0.00259405	47.5281	0.00174764	0.00305757
49.5506	0.00165762	0.00408756	49.5506	0.00299789	0.00259405	49.5506	0.00155463	0.00305757
51.573	0.00134746	0.00408756	51.573	0.0022604	0.00259405	51.573	0.00149526	0.00305757
53.5955	0.00136061	0.00408756	53.5955	0.0020024	0.00259405	53.5955	0.00153861	0.00305757
55.618	0.00139703	0.00408756	55.618	0.00211773	0.00259405	55.618	0.0016306	0.00305757
57.6404	0.00139279	0.00408756	57.6404	0.00300634	0.00259405	57.6404	0.00144118	0.00305757
59.6629	0.00138614	0.00408756	59.6629	0.004038	0.00259405	59.6629	0.0016493	0.00305757
61.6854	0.00156178	0.00408756	61.6854	0.00334801	0.00259405	61.6854	0.00154142	0.00305757
63.7079	0.00177424	0.00408756	63.7079	0.00249961	0.00259405	63.7079	0.00173098	0.00305757
65.7303	0.00186522	0.00408756	65.7303	0.00223416	0.00259405	65.7303	0.00190987	0.00305757
67.7528	0.0019852	0.00408756	67.7528	0.00238166	0.00259405	67.7528	0.00266511	0.00305757
69.7753	0.00195645	0.00408756	69.7753	0.00380608	0.00259405	69.7753	0.0031568	0.00305757
71.7978	0.00224111	0.00408756	71.7978	0.00702335	0.00259405	71.7978	0.00660881	0.00305757
73.8202	0.00348189	0.00408756	73.8202	0.00518942	0.00259405	73.8202	0.00726308	0.00305757
75.8427	0.00428745	0.00408756	75.8427	0.00287417	0.00259405	75.8427	0.0036478	0.00305757
77.8652	0.00274639	0.00408756	77.8652	0.00267324	0.00259405	77.8652	0.00314134	0.00305757
79.8876	0.00255496	0.00408756	79.8876	0.00244363	0.00259405	79.8876	0.00345848	0.00305757
81.9101	0.00241579	0.00408756	81.9101	0.00255821	0.00259405	81.9101	0.00536757	0.00305757
83.9326	0.00205082	0.00408756	83.9326	0.00217192	0.00259405	83.9326	0.00655237	0.00305757
85.9551	0.00226561	0.00408756	85.9551	0.00199177	0.00259405	85.9551	0.00728665	0.00305757
87.9775	0.0022682	0.00408756	87.9775	0.00186673	0.00259405	87.9775	0.00993196	0.00305757
90	0.00332077	0.00408756	90	0.00268623	0.00259405	90	0.0107385	0.00305757
Exp 2- Random
Random 01			Random 04			Random 10			Rnadom 20
Direction (°)	Exp2_random01	Exp2_random01-fit	Direction (°)	Exp2_random04	Exp2_random04-fit	Direction (°)	Exp2_random10	Exp2_random10-fit	Direction (°)	Exp2_random20	Exp2_random20-fit
-90	0.0076126	0.0100283	-90	0.00635391	0.0102547	-90	0.00431805	0.0047578	-90	0.0054287	0.0103033
-87.9775	0.00693976	0.0100283	-87.9775	0.0064665	0.0102547	-87.9775	0.00514354	0.00495354	-87.9775	0.00681819	0.0103033
-85.9551	0.00586958	0.0100283	-85.9551	0.00487399	0.0102547	-85.9551	0.00406662	0.00516035	-85.9551	0.00469197	0.0103033
-83.9326	0.00622649	0.0100283	-83.9326	0.00465358	0.0102547	-83.9326	0.00374534	0.00537837	-83.9326	0.00427601	0.0103033
-81.9101	0.0114312	0.0100283	-81.9101	0.00713604	0.0102547	-81.9101	0.0048528	0.00560765	-81.9101	0.006191	0.0103033
-79.8876	0.0132671	0.0100283	-79.8876	0.0088036	0.0102547	-79.8876	0.00635518	0.0058482	-79.8876	0.00792446	0.0103033
-77.8652	0.0298298	0.0100283	-77.8652	0.0224738	0.0102547	-77.8652	0.0171194	0.00609997	-77.8652	0.0229232	0.0103033
-75.8427	0.0188388	0.0100283	-75.8427	0.016914	0.0102547	-75.8427	0.0144361	0.00636283	-75.8427	0.0177761	0.0103033
-73.8202	0.0118753	0.0100283	-73.8202	0.01223	0.0102547	-73.8202	0.0119029	0.0066366	-73.8202	0.0126722	0.0103033
-71.7978	0.00713099	0.0100283	-71.7978	0.0070239	0.0102547	-71.7978	0.00679033	0.006921	-71.7978	0.00647032	0.0103033
-69.7753	0.00646717	0.0100283	-69.7753	0.00468214	0.0102547	-69.7753	0.00442112	0.00721569	-69.7753	0.00400235	0.0103033
-67.7528	0.0078939	0.0100283	-67.7528	0.00494725	0.0102547	-67.7528	0.00448675	0.00752025	-67.7528	0.00426326	0.0103033
-65.7303	0.00911826	0.0100283	-65.7303	0.00665054	0.0102547	-65.7303	0.00568467	0.00783416	-65.7303	0.00586091	0.0103033
-63.7079	0.00719539	0.0100283	-63.7079	0.00621882	0.0102547	-63.7079	0.00591725	0.00815685	-63.7079	0.00562747	0.0103033
-61.6854	0.00593141	0.0100283	-61.6854	0.00495338	0.0102547	-61.6854	0.00427249	0.00848763	-61.6854	0.00364569	0.0103033
-59.6629	0.00707395	0.0100283	-59.6629	0.00493391	0.0102547	-59.6629	0.00455841	0.00882576	-59.6629	0.00396853	0.0103033
-57.6404	0.00681597	0.0100283	-57.6404	0.00549292	0.0102547	-57.6404	0.00537797	0.00917038	-57.6404	0.00446514	0.0103033
-55.618	0.00858047	0.0100283	-55.618	0.0059118	0.0102547	-55.618	0.00558865	0.00952058	-55.618	0.00455546	0.0103033
-53.5955	0.00920123	0.0100283	-53.5955	0.00605765	0.0102547	-53.5955	0.00697841	0.00987537	-53.5955	0.00535778	0.0103033
-51.573	0.011175	0.0100283	-51.573	0.00691628	0.0102547	-51.573	0.00765475	0.0102336	-51.573	0.00626167	0.0103033
-49.5506	0.0101185	0.0100283	-49.5506	0.00816621	0.0102547	-49.5506	0.00973488	0.0105943	-49.5506	0.0075332	0.0103033
-47.5281	0.00695514	0.0100283	-47.5281	0.00736843	0.0102547	-47.5281	0.00814123	0.0109561	-47.5281	0.0059612	0.0103033
-45.5056	0.00613512	0.0100283	-45.5056	0.00722019	0.0102547	-45.5056	0.00745754	0.0113177	-45.5056	0.00652796	0.0103033
-43.4831	0.00676027	0.0100296	-43.4831	0.00829984	0.010256	-43.4831	0.00786185	0.0116779	-43.4831	0.00854295	0.0103033
-41.4607	0.00626372	0.0100594	-41.4607	0.00905602	0.0102811	-41.4607	0.00833975	0.0120352	-41.4607	0.00648192	0.0103033
-39.4382	0.00940387	0.0104251	-39.4382	0.0117158	0.0105705	-39.4382	0.0110407	0.0123882	-39.4382	0.00922961	0.0103033
-37.4157	0.0107003	0.0128423	-37.4157	0.0111148	0.0124045	-37.4157	0.0122521	0.0127356	-37.4157	0.0107043	0.0103033
-35.3933	0.0212825	0.0211179	-35.3933	0.0191506	0.0185826	-35.3933	0.0194804	0.0130757	-35.3933	0.0205697	0.0103033
-33.3708	0.0351267	0.0343152	-33.3708	0.0281275	0.028612	-33.3708	0.0276725	0.0134073	-33.3708	0.0311093	0.0103033
-31.3483	0.0394798	0.0395881	-31.3483	0.0342086	0.033281	-31.3483	0.0326616	0.0137287	-31.3483	0.0351531	0.0103033
-29.3258	0.028792	0.0300226	-29.3258	0.0253227	0.02669	-29.3258	0.0254923	0.0140385	-29.3258	0.0264141	0.0103033
-27.3034	0.0189931	0.0175442	-27.3034	0.0179375	0.01693	-27.3034	0.0194346	0.0143353	-27.3034	0.0173471	0.0103033
-25.2809	0.012829	0.0115984	-25.2809	0.0127216	0.0117975	-25.2809	0.0151633	0.0146176	-25.2809	0.0115441	0.0103033
-23.2584	0.0100063	0.0102106	-23.2584	0.00855272	0.0104576	-23.2584	0.0115687	0.0148842	-23.2584	0.00851987	0.0103033
-21.236	0.0137864	0.01004	-21.236	0.00774157	0.0102699	-21.236	0.0107533	0.0151336	-21.236	0.00872716	0.0103033
-19.2135	0.00974996	0.0100287	-19.2135	0.00749474	0.0102553	-19.2135	0.0108405	0.0153646	-19.2135	0.00878559	0.0103033
-17.191	0.00770853	0.0100283	-17.191	0.00694508	0.0102547	-17.191	0.0110572	0.0155762	-17.191	0.00851105	0.0103033
-15.1685	0.00772741	0.0100283	-15.1685	0.0078323	0.0102547	-15.1685	0.0117709	0.0157671	-15.1685	0.0100011	0.0103033
-13.1461	0.00976484	0.0100283	-13.1461	0.00958928	0.0102547	-13.1461	0.0130092	0.0159364	-13.1461	0.0115935	0.0103033
-11.1236	0.00885661	0.0100283	-11.1236	0.00787885	0.0102547	-11.1236	0.0126806	0.0160832	-11.1236	0.0102225	0.0103033
-9.10112	0.00854458	0.0100283	-9.10112	0.00798924	0.0102547	-9.10112	0.0133157	0.0162068	-9.10112	0.0109293	0.0103033
-7.07865	0.00698385	0.0100283	-7.07865	0.00671397	0.0102547	-7.07865	0.0119094	0.0163064	-7.07865	0.00956256	0.0103033
-5.05618	0.0069779	0.0100283	-5.05618	0.00756483	0.0102547	-5.05618	0.0127928	0.0163816	-5.05618	0.0106631	0.0103033
-3.03371	0.006245	0.0100283	-3.03371	0.00713784	0.0102547	-3.03371	0.01457	0.016432	-3.03371	0.0102139	0.0103033
-1.01124	0.0057808	0.0100283	-1.01124	0.00867845	0.0102547	-1.01124	0.0139131	0.0164572	-1.01124	0.0114836	0.0103033
1.01124	0.0079055	0.0100283	1.01124	0.0121157	0.0102547	1.01124	0.0165917	0.0164572	1.01124	0.0146967	0.0103033
3.03371	0.00854519	0.0100283	3.03371	0.0120449	0.0102547	3.03371	0.0174346	0.016432	3.03371	0.0128089	0.0103033
5.05618	0.00731244	0.0100283	5.05618	0.00990483	0.0102547	5.05618	0.0177032	0.0163816	5.05618	0.0114135	0.0103033
7.07865	0.00841957	0.0100283	7.07865	0.0103033	0.0102547	7.07865	0.0155547	0.0163064	7.07865	0.0109503	0.0103033
9.10112	0.0115091	0.0100283	9.10112	0.0157155	0.0102547	9.10112	0.0183656	0.0162067	9.10112	0.017026	0.0103033
11.1236	0.0194003	0.0100283	11.1236	0.0212652	0.0102547	11.1236	0.0207799	0.0160831	11.1236	0.021807	0.0103033
13.1461	0.022488	0.0100283	13.1461	0.0266777	0.0102547	13.1461	0.0254992	0.0159363	13.1461	0.0279391	0.0103033
15.1685	0.0283395	0.0100283	15.1685	0.0261266	0.0102547	15.1685	0.0234582	0.015767	15.1685	0.0278147	0.0103033
17.191	0.0147111	0.0100283	17.191	0.0162813	0.0102547	17.191	0.0167481	0.015576	17.191	0.0188334	0.0103033
19.2135	0.0106277	0.0100283	19.2135	0.0140741	0.0102547	19.2135	0.015194	0.0153645	19.2135	0.0220517	0.0103033
21.236	0.0106331	0.0100283	21.236	0.0128366	0.0102547	21.236	0.0153754	0.0151334	21.236	0.017198	0.0103033
23.2584	0.00943908	0.0100283	23.2584	0.0147132	0.0102547	23.2584	0.018209	0.014884	23.2584	0.0142622	0.0103033
25.2809	0.0107747	0.0100283	25.2809	0.0162955	0.0102547	25.2809	0.024301	0.0146174	25.2809	0.0152343	0.0103033
27.3034	0.00873332	0.0100283	27.3034	0.0137796	0.0102547	27.3034	0.0138047	0.0143351	27.3034	0.0108341	0.0103033
29.3258	0.00818018	0.0100283	29.3258	0.0102007	0.0102547	29.3258	0.00866874	0.0140383	29.3258	0.00922208	0.0103033
31.3483	0.00887306	0.0100283	31.3483	0.0111647	0.0102547	31.3483	0.0078911	0.0137285	31.3483	0.00893554	0.0103033
33.3708	0.00680186	0.0100283	33.3708	0.0122958	0.0102547	33.3708	0.00642284	0.0134071	33.3708	0.00739466	0.0103033
35.3933	0.00640229	0.0100283	35.3933	0.0146468	0.0102547	35.3933	0.00661971	0.0130755	35.3933	0.00749737	0.0103033
37.4157	0.00629188	0.0100283	37.4157	0.0140115	0.0102547	37.4157	0.00645175	0.0127353	37.4157	0.00763622	0.0103033
39.4382	0.00745982	0.0100283	39.4382	0.0139202	0.0102547	39.4382	0.00805719	0.012388	39.4382	0.0101237	0.0103033
41.4607	0.00664431	0.0100283	41.4607	0.0122271	0.0102547	41.4607	0.00684557	0.0120349	41.4607	0.0082039	0.0103033
43.4831	0.00500135	0.0100283	43.4831	0.00970461	0.0102547	43.4831	0.00544189	0.0116776	43.4831	0.00749467	0.0103033
45.5056	0.00510642	0.0100283	45.5056	0.00816327	0.0102547	45.5056	0.0057982	0.0113175	45.5056	0.00810809	0.0103033
47.5281	0.00583919	0.0100283	47.5281	0.00813598	0.0102547	47.5281	0.00601493	0.0109558	47.5281	0.00803798	0.0103034
49.5506	0.00631165	0.0100283	49.5506	0.00767999	0.0102547	49.5506	0.00601058	0.0105941	49.5506	0.00738414	0.0103086
51.573	0.00905217	0.0100283	51.573	0.0100847	0.0102547	51.573	0.011712	0.0102334	51.573	0.00965359	0.0104653
53.5955	0.0205378	0.0100283	53.5955	0.0162697	0.0102547	53.5955	0.0170542	0.00987514	53.5955	0.0168384	0.012382
55.618	0.0249617	0.0100283	55.618	0.0175855	0.0102547	55.618	0.0160999	0.00952036	55.618	0.0185911	0.021456
57.6404	0.0372601	0.0100283	57.6404	0.0319306	0.0102547	57.6404	0.0288922	0.00917016	57.6404	0.0369313	0.0353216
59.6629	0.0321742	0.0100283	59.6629	0.0277479	0.0102547	59.6629	0.0232727	0.00882554	59.6629	0.0329563	0.0337691
61.6854	0.0178298	0.0100283	61.6854	0.0166114	0.0102547	61.6854	0.0147548	0.00848742	61.6854	0.0194353	0.0195059
63.7079	0.0117886	0.0100283	63.7079	0.0125056	0.0102547	63.7079	0.010572	0.00815664	63.7079	0.0135524	0.0118123
65.7303	0.00753869	0.0100283	65.7303	0.0076159	0.0102547	65.7303	0.00603542	0.00783396	65.7303	0.00724241	0.0104068
67.7528	0.0054972	0.0100283	67.7528	0.00609046	0.0102547	67.7528	0.00457999	0.00752005	67.7528	0.00496846	0.0103063
69.7753	0.00536683	0.0100283	69.7753	0.00609978	0.0102547	69.7753	0.00449108	0.0072155	69.7753	0.00474418	0.0103034
71.7978	0.0049725	0.0100283	71.7978	0.00526959	0.0102547	71.7978	0.00388119	0.00692082	71.7978	0.00370837	0.0103033
73.8202	0.00572896	0.0100283	73.8202	0.00554366	0.0102547	73.8202	0.00415234	0.00663642	73.8202	0.00427955	0.0103033
75.8427	0.00734094	0.0100283	75.8427	0.00676588	0.0102547	75.8427	0.0050974	0.00636266	75.8427	0.00563011	0.0103033
77.8652	0.00619632	0.0100283	77.8652	0.00638209	0.0102547	77.8652	0.00530372	0.00609981	77.8652	0.00547368	0.0103033
79.8876	0.00569869	0.0100283	79.8876	0.00556999	0.0102547	79.8876	0.0046362	0.00584804	79.8876	0.00435928	0.0103033
81.9101	0.00518972	0.0100283	81.9101	0.00537105	0.0102547	81.9101	0.00421155	0.0056075	81.9101	0.003894	0.0103033
83.9326	0.00614693	0.0100283	83.9326	0.00480356	0.0102547	83.9326	0.00393578	0.00537822	83.9326	0.00348756	0.0103033
85.9551	0.00644833	0.0100283	85.9551	0.00477485	0.0102547	85.9551	0.00398968	0.00516021	85.9551	0.00352791	0.0103033
87.9775	0.00746067	0.0100283	87.9775	0.00411637	0.0102547	87.9775	0.00318286	0.00495341	87.9775	0.00287675	0.0103033
90	0.0076126	0.0100283	90	0.00635391	0.0102547	90	0.00431805	0.00475768	90	0.0054287	0.0103033
Exp3- Aligned
Aligned 02			Aligned 11			Aligned 21
Direction (°)	Exp3_aligned02	Exp3_aligned02-fit	Direction (°)	Exp3_aligned11	Exp3_aligned11-fit	Direction (°)	Exp3_aligned21	Exp3_aligned21-fit
-90	0.0338385	0.03062	-90	0.0288716	0.022624	-90	0.0365539	0.032455
-87.9775	0.0219526	0.0263682	-87.9775	0.0181047	0.0215001	-87.9775	0.0153265	0.0233005
-85.9551	0.0221219	0.0229922	-85.9551	0.0176653	0.0203355	-85.9551	0.0157927	0.017965
-83.9326	0.0209445	0.0203118	-83.9326	0.0125817	0.0191646	-83.9326	0.0149579	0.0148565
-81.9101	0.0180519	0.0181839	-81.9101	0.0177576	0.0180187	-81.9101	0.0181332	0.0130463
-79.8876	0.0168398	0.0164946	-79.8876	0.0174327	0.0169239	-79.8876	0.0182318	0.0119925
-77.8652	0.0165725	0.0151537	-77.8652	0.0181742	0.0159014	-77.8652	0.0164025	0.0113794
-75.8427	0.0135061	0.0140894	-75.8427	0.0183305	0.014966	-75.8427	0.0133776	0.0110227
-73.8202	0.0132896	0.0132447	-73.8202	0.0176549	0.0141274	-73.8202	0.011823	0.0108154
-71.7978	0.0124434	0.0125744	-71.7978	0.0151355	0.0133896	-71.7978	0.0111952	0.0106949
-69.7753	0.0128769	0.0120424	-69.7753	0.0149574	0.0127525	-69.7753	0.0106558	0.0106248
-67.7528	0.0130718	0.0116203	-67.7528	0.0136909	0.012212	-67.7528	0.0119307	0.0105842
-65.7303	0.011926	0.0112854	-65.7303	0.0108328	0.0117613	-65.7303	0.00964386	0.0105606
-63.7079	0.0116867	0.0110197	-63.7079	0.0097237	0.0113919	-63.7079	0.00888943	0.0105469
-61.6854	0.0101713	0.010809	-61.6854	0.00888932	0.0110941	-61.6854	0.00732825	0.010539
-59.6629	0.0105083	0.0106418	-59.6629	0.00780099	0.010858	-59.6629	0.00736261	0.0105344
-57.6404	0.0109879	0.0105091	-57.6404	0.00756815	0.0106737	-57.6404	0.00657824	0.0105317
-55.618	0.0101879	0.0104039	-55.618	0.00828551	0.0105321	-55.618	0.00656962	0.0105301
-53.5955	0.0110513	0.0103205	-53.5955	0.00985658	0.0104251	-53.5955	0.00653209	0.0105292
-51.573	0.0103396	0.0102544	-51.573	0.0103379	0.0103454	-51.573	0.00553365	0.0105287
-49.5506	0.00880727	0.0102019	-49.5506	0.00823835	0.0102871	-49.5506	0.00489719	0.0105284
-47.5281	0.00964842	0.0101603	-47.5281	0.00529019	0.0102449	-47.5281	0.00484564	0.0105283
-45.5056	0.0107877	0.0101273	-45.5056	0.00500815	0.010215	-45.5056	0.00558977	0.0105282
-43.4831	0.00971606	0.0101012	-43.4831	0.00521349	0.010194	-43.4831	0.00579458	0.0105281
-41.4607	0.011277	0.0100805	-41.4607	0.00631398	0.0101796	-41.4607	0.00702238	0.0105281
-39.4382	0.0100622	0.010064	-39.4382	0.00607776	0.0101697	-39.4382	0.00662416	0.010528
-37.4157	0.0127294	0.010051	-37.4157	0.00795075	0.0101631	-37.4157	0.00731354	0.010528
-35.3933	0.0114456	0.0100407	-35.3933	0.0113341	0.0101588	-35.3933	0.0090667	0.010528
-33.3708	0.00976933	0.0100325	-33.3708	0.00616779	0.010156	-33.3708	0.00985269	0.010528
-31.3483	0.00745176	0.010026	-31.3483	0.00534003	0.0101542	-31.3483	0.0130193	0.010528
-29.3258	0.00601535	0.0100209	-29.3258	0.00486507	0.010153	-29.3258	0.0111118	0.010528
-27.3034	0.00467545	0.0100168	-27.3034	0.00486112	0.0101523	-27.3034	0.011327	0.010528
-25.2809	0.00443547	0.0100136	-25.2809	0.00388768	0.0101519	-25.2809	0.00986302	0.010528
-23.2584	0.00433594	0.0100111	-23.2584	0.00338905	0.0101516	-23.2584	0.00926392	0.010528
-21.236	0.00480964	0.010009	-21.236	0.00321345	0.0101515	-21.236	0.00845398	0.010528
-19.2135	0.00488858	0.0100074	-19.2135	0.00298633	0.0101514	-19.2135	0.00805115	0.010528
-17.191	0.00474714	0.0100062	-17.191	0.00292247	0.0101513	-17.191	0.00668707	0.010528
-15.1685	0.00494275	0.0100052	-15.1685	0.00295532	0.0101513	-15.1685	0.00678702	0.010528
-13.1461	0.00546991	0.0100044	-13.1461	0.00325902	0.0101513	-13.1461	0.00828279	0.010528
-11.1236	0.00578893	0.0100037	-11.1236	0.00351538	0.0101513	-11.1236	0.00827353	0.010528
-9.10112	0.00514557	0.0100032	-9.10112	0.00421965	0.0101513	-9.10112	0.00998483	0.010528
-7.07865	0.00455931	0.0100028	-7.07865	0.00469737	0.0101513	-7.07865	0.011451	0.010528
-5.05618	0.00546036	0.0100025	-5.05618	0.00442268	0.0101513	-5.05618	0.015695	0.010528
-3.03371	0.0066501	0.0100023	-3.03371	0.0037124	0.0101513	-3.03371	0.0179908	0.010528
-1.01124	0.00720107	0.0100021	-1.01124	0.00425866	0.0101513	-1.01124	0.0109171	0.010528
1.01124	0.00605863	0.0100019	1.01124	0.00467598	0.0101513	1.01124	0.00740023	0.010528
3.03371	0.00532857	0.0100018	3.03371	0.00586758	0.0101513	3.03371	0.00557307	0.010528
5.05618	0.0048874	0.0100017	5.05618	0.00823538	0.0101513	5.05618	0.00436497	0.010528
7.07865	0.00403455	0.0100016	7.07865	0.00688926	0.0101513	7.07865	0.00403761	0.010528
9.10112	0.00356066	0.0100016	9.10112	0.00439209	0.0101513	9.10112	0.00330294	0.010528
11.1236	0.00335786	0.0100015	11.1236	0.00437833	0.0101513	11.1236	0.00297488	0.010528
13.1461	0.00306685	0.0100015	13.1461	0.00430455	0.0101513	13.1461	0.00273132	0.010528
15.1685	0.00312384	0.0100015	15.1685	0.00512452	0.0101513	15.1685	0.00272302	0.010528
17.191	0.00318314	0.0100014	17.191	0.0065619	0.0101513	17.191	0.00304245	0.010528
19.2135	0.00339742	0.0100014	19.2135	0.00699033	0.0101513	19.2135	0.00403558	0.010528
21.236	0.00389535	0.0100014	21.236	0.00857129	0.0101513	21.236	0.00718748	0.010528
23.2584	0.00398325	0.0100014	23.2584	0.00953417	0.0101513	23.2584	0.0059486	0.010528
25.2809	0.00417393	0.0100014	25.2809	0.0095876	0.0101513	25.2809	0.00597157	0.010528
27.3034	0.00463709	0.0100014	27.3034	0.00842315	0.0101513	27.3034	0.00501545	0.010528
29.3258	0.00480886	0.0100014	29.3258	0.00883794	0.0101513	29.3258	0.00381302	0.010528
31.3483	0.00544869	0.0100014	31.3483	0.00758018	0.0101513	31.3483	0.00343503	0.010528
33.3708	0.00541124	0.0100014	33.3708	0.00757923	0.0101513	33.3708	0.00371718	0.010528
35.3933	0.00483279	0.0100014	35.3933	0.00897981	0.0101513	35.3933	0.00373307	0.010528
37.4157	0.00502926	0.0100014	37.4157	0.00860597	0.0101513	37.4157	0.00377029	0.010528
39.4382	0.00552874	0.0100014	39.4382	0.00900249	0.0101513	39.4382	0.00356105	0.010528
41.4607	0.0059056	0.0100014	41.4607	0.010426	0.0101513	41.4607	0.00407826	0.010528
43.4831	0.00605591	0.0100014	43.4831	0.010337	0.0101513	43.4831	0.00462237	0.010528
45.5056	0.00647264	0.0100014	45.5056	0.010307	0.0101513	45.5056	0.0048621	0.010528
47.5281	0.00814487	0.0100014	47.5281	0.0109632	0.0101513	47.5281	0.00483876	0.010528
49.5506	0.00889305	0.0100014	49.5506	0.0141578	0.0101513	49.5506	0.0069044	0.010528
51.573	0.0105524	0.0100014	51.573	0.0157287	0.0101513	51.573	0.0116884	0.010528
53.5955	0.0107701	0.0100014	53.5955	0.0131501	0.0101513	53.5955	0.0156824	0.010528
55.618	0.010129	0.0100014	55.618	0.0130686	0.0101513	55.618	0.0150643	0.010528
57.6404	0.00879549	0.0100014	57.6404	0.0128231	0.0101513	57.6404	0.0166199	0.010528
59.6629	0.00933748	0.0100014	59.6629	0.014434	0.0101513	59.6629	0.0186277	0.010528
61.6854	0.00939865	0.0100014	61.6854	0.0153354	0.0101513	61.6854	0.020384	0.010528
63.7079	0.0117856	0.0100014	63.7079	0.0177669	0.0101513	63.7079	0.0202075	0.010528
65.7303	0.0131877	0.0100014	65.7303	0.0179861	0.0101513	65.7303	0.0177711	0.010528
67.7528	0.0152006	0.0100014	67.7528	0.0155373	0.0101513	67.7528	0.017967	0.010528
69.7753	0.0189328	0.0100014	69.7753	0.0153002	0.0101513	69.7753	0.0168732	0.010528
71.7978	0.0239397	0.0100014	71.7978	0.0171087	0.0101513	71.7978	0.0190385	0.010528
73.8202	0.0285941	0.0100014	73.8202	0.0210871	0.0101513	73.8202	0.0186717	0.010528
75.8427	0.0287705	0.0100014	75.8427	0.0245639	0.0101513	75.8427	0.0198655	0.010528
77.8652	0.0279915	0.0100014	77.8652	0.0257276	0.0101513	77.8652	0.021947	0.010528
79.8876	0.0305561	0.0100014	79.8876	0.0274476	0.0101513	79.8876	0.0266548	0.010528
81.9101	0.0263577	0.0100014	81.9101	0.0263595	0.0101513	81.9101	0.0221731	0.010528
83.9326	0.026933	0.0100014	83.9326	0.0273125	0.0101513	83.9326	0.0227884	0.010528
85.9551	0.0268396	0.0100014	85.9551	0.0238703	0.0101513	85.9551	0.0281842	0.010528
87.9775	0.0216804	0.0100014	87.9775	0.0184554	0.0101513	87.9775	0.0206084	0.010528
90	0.0338385	0.0100014	90	0.0288716	0.0101513	90	0.0365539	0.010528
Exp3- Random
Random 02			Random 11			Random 21
Direction (°)	Exp3_random02	Exp3_random02-fit	Direction (°)	Exp3_random11	Exp3_random11-fit	Direction (°)	Exp3_random21	Exp3_random21-fit
-90	0.00460324	0.0103763	-90	0.00274697	0.00910106	-90	0.00164006	0.0063763
-87.9775	0.00334445	0.0103763	-87.9775	0.0022386	0.00910106	-87.9775	0.00155258	0.0063763
-85.9551	0.00502851	0.0103763	-85.9551	0.00221456	0.00910106	-85.9551	0.00158128	0.0063763
-83.9326	0.0058134	0.0103763	-83.9326	0.00213602	0.00910106	-83.9326	0.00158941	0.0063763
-81.9101	0.00623131	0.0103763	-81.9101	0.00206501	0.00910106	-81.9101	0.00159514	0.0063763
-79.8876	0.00422685	0.0103763	-79.8876	0.00227299	0.00910106	-79.8876	0.00163148	0.0063763
-77.8652	0.0041576	0.0103763	-77.8652	0.0037953	0.00910106	-77.8652	0.00174306	0.0063763
-75.8427	0.0081105	0.0103763	-75.8427	0.00835611	0.00910106	-75.8427	0.00178966	0.0063763
-73.8202	0.0125371	0.0103763	-73.8202	0.00463507	0.00910106	-73.8202	0.00190502	0.0063763
-71.7978	0.0250286	0.0103763	-71.7978	0.00240673	0.00910106	-71.7978	0.00213311	0.0063763
-69.7753	0.0165883	0.0103763	-69.7753	0.0020065	0.00910106	-69.7753	0.00264799	0.0063763
-67.7528	0.0110712	0.0103763	-67.7528	0.00193308	0.00910106	-67.7528	0.00300282	0.0063763
-65.7303	0.00609489	0.0103763	-65.7303	0.00191609	0.00910106	-65.7303	0.0031606	0.0063763
-63.7079	0.00501759	0.0103763	-63.7079	0.00189989	0.00910106	-63.7079	0.00342145	0.0063763
-61.6854	0.0055054	0.0103763	-61.6854	0.00187936	0.00910106	-61.6854	0.00404521	0.0063763
-59.6629	0.00714447	0.0103763	-59.6629	0.00199291	0.00910106	-59.6629	0.00449064	0.0063763
-57.6404	0.00624354	0.0103763	-57.6404	0.0022001	0.00910106	-57.6404	0.00513117	0.0063763
-55.618	0.00428999	0.0103763	-55.618	0.00216117	0.00910106	-55.618	0.00547146	0.0063763
-53.5955	0.00507656	0.0103763	-53.5955	0.00254274	0.00910106	-53.5955	0.00590149	0.0063763
-51.573	0.00473598	0.0103763	-51.573	0.00339485	0.00910106	-51.573	0.006711	0.0063763
-49.5506	0.00595179	0.0103763	-49.5506	0.00558079	0.00910106	-49.5506	0.00881088	0.0063763
-47.5281	0.00627215	0.0103763	-47.5281	0.0046116	0.00910106	-47.5281	0.00645683	0.0063763
-45.5056	0.00819109	0.0103763	-45.5056	0.00625513	0.00910106	-45.5056	0.00524089	0.0063763
-43.4831	0.00843945	0.0103763	-43.4831	0.00960932	0.00910106	-43.4831	0.00472058	0.0063763
-41.4607	0.00754379	0.0103763	-41.4607	0.0227147	0.00910106	-41.4607	0.00504918	0.0063763
-39.4382	0.00716677	0.0103763	-39.4382	0.0418525	0.00910106	-39.4382	0.00527323	0.0063763
-37.4157	0.00729485	0.0103763	-37.4157	0.0201346	0.00910106	-37.4157	0.00550194	0.0063763
-35.3933	0.00749052	0.0103763	-35.3933	0.013016	0.00910106	-35.3933	0.00603189	0.0063763
-33.3708	0.0104635	0.0103763	-33.3708	0.0108854	0.00910106	-33.3708	0.00785594	0.0063763
-31.3483	0.0145922	0.0103763	-31.3483	0.00958376	0.00910106	-31.3483	0.0109082	0.0063763
-29.3258	0.0235645	0.0103763	-29.3258	0.00653741	0.00910106	-29.3258	0.0118624	0.0063763
-27.3034	0.0355136	0.0103763	-27.3034	0.00547284	0.00910106	-27.3034	0.00694719	0.0063763
-25.2809	0.035576	0.0103763	-25.2809	0.00528879	0.00910106	-25.2809	0.00522394	0.0063763
-23.2584	0.022493	0.0103763	-23.2584	0.0051261	0.00910106	-23.2584	0.0052342	0.0063763
-21.236	0.0176267	0.0103763	-21.236	0.00509616	0.00910106	-21.236	0.0058486	0.0063763
-19.2135	0.0103143	0.0103763	-19.2135	0.00531447	0.00910106	-19.2135	0.00752774	0.0063763
-17.191	0.0097202	0.0103763	-17.191	0.00580187	0.00910106	-17.191	0.0101413	0.00637631
-15.1685	0.0093802	0.0103763	-15.1685	0.00795744	0.00910106	-15.1685	0.0111809	0.00637631
-13.1461	0.00909391	0.0103763	-13.1461	0.00836588	0.00910106	-13.1461	0.0146888	0.00637633
-11.1236	0.00944851	0.0103763	-11.1236	0.00626973	0.00910106	-11.1236	0.0150483	0.0063764
-9.10112	0.0104326	0.0103763	-9.10112	0.00630258	0.00910106	-9.10112	0.0168385	0.00637664
-7.07865	0.0110018	0.0103763	-7.07865	0.0065115	0.00910106	-7.07865	0.018245	0.00637739
-5.05618	0.00990683	0.0103763	-5.05618	0.00721442	0.00910106	-5.05618	0.0217919	0.00637955
-3.03371	0.010366	0.0103763	-3.03371	0.00830199	0.00910106	-3.03371	0.0231343	0.00638547
-1.01124	0.00964763	0.0103763	-1.01124	0.0159963	0.00910106	-1.01124	0.0212025	0.00640069
1.01124	0.0105335	0.0103763	1.01124	0.0726889	0.00910106	1.01124	0.0154914	0.00643738
3.03371	0.0109806	0.0103763	3.03371	0.0269998	0.00910106	3.03371	0.013624	0.00652027
5.05618	0.0153588	0.0103763	5.05618	0.0201032	0.00910106	5.05618	0.0174836	0.00669581
7.07865	0.0137004	0.0103763	7.07865	0.0311356	0.00910106	7.07865	0.0152553	0.00704383
9.10112	0.0110309	0.0103763	9.10112	0.0399827	0.00910106	9.10112	0.0150465	0.00768924
11.1236	0.0113925	0.0103763	11.1236	0.0177844	0.00910106	11.1236	0.0164584	0.00880742
13.1461	0.0112945	0.0103763	13.1461	0.0207742	0.00910106	13.1461	0.015863	0.0106142
15.1685	0.017656	0.0103763	15.1685	0.0141532	0.00910106	15.1685	0.0188607	0.0133312
17.191	0.0246109	0.0103763	17.191	0.0411172	0.00910106	17.191	0.0189356	0.0171215
19.2135	0.0278262	0.0103763	19.2135	0.0294472	0.00910106	19.2135	0.0188772	0.022005
21.236	0.0218215	0.0103763	21.236	0.0066849	0.00910106	21.236	0.0257708	0.0277766
23.2584	0.017069	0.0103763	23.2584	0.00585305	0.00910106	23.2584	0.0341324	0.0339631
25.2809	0.0149197	0.0103763	25.2809	0.00586999	0.00910109	25.2809	0.0400279	0.0398552
27.3034	0.0106543	0.0103763	27.3034	0.00717361	0.00911805	27.3034	0.0338657	0.044626
29.3258	0.0120789	0.0103763	29.3258	0.0107197	0.0108997	29.3258	0.0407992	0.0475169
31.3483	0.0115384	0.0103763	31.3483	0.0413741	0.041065	31.3483	0.0523353	0.0480344
33.3708	0.0107808	0.0103763	33.3708	0.104152	0.104437	33.3708	0.0681262	0.0460877
35.3933	0.00936647	0.0103763	35.3933	0.0573702	0.0568237	35.3933	0.0403439	0.0420147
37.4157	0.0109661	0.0103763	37.4157	0.0110609	0.0131103	37.4157	0.0236278	0.0364861
39.4382	0.0105524	0.0103763	39.4382	0.00620121	0.00915759	39.4382	0.0319102	0.0303251
41.4607	0.0103497	0.0103763	41.4607	0.00462555	0.0091012	41.4607	0.0313054	0.024309
43.4831	0.00953338	0.0103763	43.4831	0.004198	0.00910106	43.4831	0.0156283	0.0190177
45.5056	0.00959718	0.0103763	45.5056	0.00491949	0.00910106	45.5056	0.010149	0.0147657
47.5281	0.00703255	0.0103763	47.5281	0.00513396	0.00910106	47.5281	0.00598559	0.0116178
49.5506	0.00699076	0.0103763	49.5506	0.00699604	0.00910106	49.5506	0.00668707	0.00945924
51.573	0.00578331	0.0103763	51.573	0.00828051	0.00910106	51.573	0.00891614	0.00808341
53.5955	0.0058427	0.0103766	53.5955	0.00542193	0.00910106	53.5955	0.00663445	0.00726621
55.618	0.00582402	0.0103926	55.618	0.00371379	0.00910106	55.618	0.0041336	0.00681303
57.6404	0.0100991	0.0107927	57.6404	0.00303255	0.00910106	57.6404	0.00283846	0.00657808
59.6629	0.0174447	0.0145526	59.6629	0.00297751	0.00910106	59.6629	0.00252277	0.00646407
61.6854	0.0243747	0.0268351	61.6854	0.00310023	0.00910106	61.6854	0.00222572	0.00641224
63.7079	0.0379744	0.0358633	63.7079	0.0047099	0.00910106	63.7079	0.00209324	0.00639016
65.7303	0.0237412	0.0258841	65.7303	0.00790979	0.00910106	65.7303	0.00217244	0.00638133
67.7528	0.0164655	0.0140839	67.7528	0.00656036	0.00910106	67.7528	0.00206782	0.00637802
69.7753	0.00913212	0.0107246	69.7753	0.00525471	0.00910106	69.7753	0.00181034	0.00637686
71.7978	0.00517556	0.0103892	71.7978	0.00650584	0.00910106	71.7978	0.00170908	0.00637647
73.8202	0.00458493	0.0103765	73.8202	0.00556605	0.00910106	73.8202	0.00169349	0.00637635
75.8427	0.00419427	0.0103763	75.8427	0.00317717	0.00910106	75.8427	0.00164852	0.00637632
77.8652	0.00421091	0.0103763	77.8652	0.00300178	0.00910106	77.8652	0.00165229	0.00637631
79.8876	0.00488733	0.0103763	79.8876	0.00293987	0.00910106	79.8876	0.00157468	0.0063763
81.9101	0.00654056	0.0103763	81.9101	0.00334827	0.00910106	81.9101	0.00155885	0.0063763
83.9326	0.00462767	0.0103763	83.9326	0.00697458	0.00910106	83.9326	0.00152644	0.0063763
85.9551	0.00455009	0.0103763	85.9551	0.0098653	0.00910106	85.9551	0.00153609	0.0063763
87.9775	0.00396701	0.0103763	87.9775	0.00379848	0.00910106	87.9775	0.00154537	0.0063763
90	0.00460324	0.0103763	90	0.00274697	0.00910106	90	0.00164006	0.0063763
